# Supplementary material
Source: PubMed Central journal article supplement (PMC2867872)
Supplement: 0914613107_pnas.200914613SI.pdf [file 0914613107_pnas.200914613SI.pdf]

# Supporting Information

Tronel et al. 10.1073/pnas.0914613107

## SI Experimental Procedures

**Lentivirus-Mediated Labeling of Neurons.** The lentivirus-based lentiviral vector, pTRIPΔU3-MND-Dsred2-WPRE (Dsred2-LV), was produced by transient transfection of 293T cells according to standard protocols (1). In brief, subconfluent 293T cells were cotransfected with lentiviral genome (psPAX2) (2), with an envelope-coding plasmid (pMD2G-VSVG) and with vector constructs by calcium phosphate precipitation. Lentiviruses were harvested 40 h posttransfection and concentrated by ultracentrifugation. Titer ( $2.05 \times 10^8$  PFU·mL<sup>-1</sup>) was determined on 293T cells as transducing units using serial dilutions of vector stocks.

**Surgery.** Rats were anesthetized with ketamine (60 mg/kg) and xylazine (7.5 mg/kg), and minipumps were implanted. In brief, a stainless steel cannula (28 gauge) connected by a catheter to the minipump was implanted into the left ventricle (bregma AP, -0.4 mm; lateral, 1.3 mm; vertical, 5 mm below the surface of the skull). Alzet 2002 osmotic pumps were filled with either aCSF or D-APV (30 mM) or MK 801 (2 mM) and then implanted in the scapula. Animals were injected with BrdU on the day after surgery and then allowed to recover for 7 days. The infusion was started on the day before the first training day. For virus infusions, the tooth bar was set at 5.5 mm above the interaural zero; coordinates were +3 mm posterior to bregma, ±2.6 mm lateral, and -4 mm below the surface of the dura. Then 3 μL of viral solution was injected at a rate of 0.375 μL/min.

**Immunohistochemistry.** Free-floating sections (50 μm) were processed in a standard immunohistochemical procedure to visualize BrdU (1:100; Dako), HH3 (1/2,000; Cell Signaling), fractin (1/5,000; BD PharMingen), eGFP (1/500; BD PharMingen), and synaptophysin (1/500, Boehringer). The number of IR cells in the DG was estimated using the optical fractionation method. BrdU-Dcx and GFP-IR neurons were visualized as described previously (3). Morphometric analysis of BrdU-Dcx and virus-labeled neurons was performed with a 100× objective using a semiautomatic

neuron tracing system (NeuroLucida; Microbrightfield). In brief, for each group, the neurons (at least 10 per brain) were selected based on the following criteria: neurons exhibited vertically oriented dendrites that extended into the dentate molecular layer, and dendrites of selected neurons had minimal overlap with the dendrites of adjacent cells, to allow unambiguous tracing of the dendritic tree. Data for various metric measurements, including cell body area, number of dendritic nodes, number of dendritic ends, and total dendritic length, were calculated. Then the spatial distribution of dendritic branches was analyzed using the concentric analysis of Sholl, performed using the Neuroexplorer component of the NeuroLucida program. The data were reanalyzed by counting the number of occurrences of branch points in the dendritic arbor falling between concentric spheres separated by a fixed number of microns (25 μm).

The phenotype of BrdU-IR cells was examined by immunofluorescence double-labeling using rat anti-BrdU (1:500; Accurate Scientific) combined with a marker of mature neurons (NeuN, 1:1,000; Chemicon) revealed with, respectively, Cy3 goat anti-rat antibody (1:1,000; Jackson Laboratory) and Alexa-Fluor 488 goat anti-mouse (1:1,000; Invitrogen). At least 50 BrdU-IR cells per animal were analyzed using a confocal microscope (Leica DMR TCS SP2) with a plane apochromatic 63× oil lens (numerical aperture 1.4; Leica). All quantifications were performed by the same investigator, who was blinded to the experimental conditions.

For spine analysis, images of GFP-IR dendritic processes were acquired at 0.2-μm intervals with the SPE confocal system with a plane apochromatic 63× oil lens (numerical aperture 1.4; Leica) and a digital zoom of 2. Maximum projections of z-series were created with the Volocity software (Improvision). A 40-μm segment was traced on each dendrite, and the numbers of spines, lengths of spines, and sizes of the spine heads were determined. A total of 10 neurons from 5 rats from each group were analyzed (~1,000 spines).

1. Sena-Esteves M, Tebbets JC, Steffens S, Crombleholme T, Flake AW (2004) Optimized large-scale production of high titer lentivirus vector pseudotypes. *J Virol Methods* 122: 131–139.
2. Dull T, et al. (1998) A third-generation lentivirus vector with a conditional packaging system. *J Virol* 72:8463–8471.

3. Rao MS, Shetty AK (2004) Efficacy of doublecortin as a marker to analyse the absolute number and dendritic growth of newly generated neurons in the adult dentate gyrus. *Eur J Neurosci* 19:234–246.

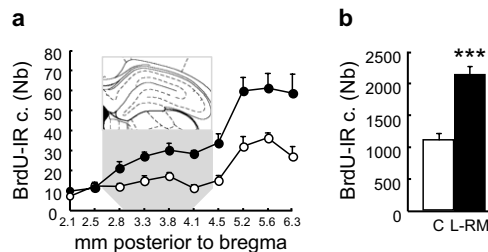

**Fig. S1.** (A) Septotemporal distribution of BrdU-IR cells. (B) Number of BrdU-IR cells in the septal region of the DG ( $t_{15} = -5.46$ ;  $P < 0.001$ ). C, control ( $n = 6$ ), L-RM, learning RM ( $n = 11$ ). \*\*\* $P \leq 0.001$  compared with control.







**Table S1. Summary of the procedures**

| Experiment                                                                     | Days of XdU or retrovirus injections in respect to training days (Dn) | Group size                                                | Duration of training | Time of sacrifice in respect to the start of training |
|--------------------------------------------------------------------------------|-----------------------------------------------------------------------|-----------------------------------------------------------|----------------------|-------------------------------------------------------|
| 1a Influence of RM learning on neurons born 1 week before exposure to the task | BrdU on -D7                                                           | C = 6; L-RM = 11                                          | 6 days               | Seventh day                                           |
| 1b Influence of RM learning on neurons born during the early phase of training | BrdU on D1-D4                                                         | C = 6; L-RM = 7                                           | 8 days               | Ninth day                                             |
| 2 Effect of zVAD infusion on learning-induced dendritic changes                | IdU on -D7;<br>CldU on -D3                                            | C Veh = 6; L-RM Veh = 10<br>Cz VAD = 6; L-RMz VAD = 7     | 6 days               | Seventh day                                           |
| 3 Time-course study of learning-induced dendritic changes                      | GFP-retrovirus infusion on -D7                                        | C = 9; L-RM = 8                                           | 6 days               | Seventh day                                           |
| Time-course study of learning-induced dendritic changes                        | GFP-retrovirus infusion on -D7                                        | C = 8; L-RM = 8                                           | 6 days               | 36th day                                              |
| Time-course study of learning-induced dendritic changes                        | GFP-retrovirus infusion on -D7                                        | C = 7; L-RM = 9                                           | 6 days               | 66th day                                              |
| Time-course study of learning-induced dendritic changes                        | GFP-retrovirus infusion on -D7                                        | C = 7; L-RM = 8                                           | 6 days               | 96th day                                              |
| 4 Influence of learning on mature neurons                                      | Dsr-dlentivirus infusion on -D7                                       | C = 8; L-RM = 14                                          | 6 days               | Seventh day                                           |
| 5 Influence of the cognitive demand                                            | BrdU on -D7                                                           | C = 8; L-RM = 8; L-DMP = 8                                | 6 days               | Seventh day                                           |
| 6 Role of NMDA receptors (APV)                                                 | BrdU on -D7                                                           | C CSF = 7; L-DMP CSF = 10;<br>C APV = 9; L-DMP APV = 9    | 9 days               | 10th day                                              |
| Role of NMDA receptors (MK801)                                                 | BrdU on -D7                                                           | C CSF = 9; L-DMP CSF = 7;<br>C MK801 = 5; L-DMP MK801 = 5 | 9 days               | 10th day                                              |

**Table S2. Morphological analysis of GFP-IR neurons of animals of the L-RM and control groups**

| Delay between training and sacrifice | Group          |                | Statistical significance    |
|--------------------------------------|----------------|----------------|-----------------------------|
|                                      | Control        | L-RM           |                             |
| Cell body (area)                     |                |                |                             |
| 1D                                   | 44.84 ± 1.60   | 47.35 ± 2.85   | $t_{15} = -0.7; P = 0.4$    |
| 1M                                   | 57.74 ± 2.38   | 60.16 ± 1.94   | $t_{14} = -0.8; P = 0.44$   |
| 2M                                   | 58.50 ± 3.25   | 66.43 ± 2.04   | $t_{14} = -2.16; P = 0.05$  |
| 3M                                   | 71.38 ± 1.96   | 70.67 ± 3.62   | $t_{14} = 0.16; P = 0.87$   |
| Nodes (Nb)                           |                |                |                             |
| 1D                                   | 1.17 ± 0.14    | 2.27 ± 0.16    | $t_{15} = -4.17; P < 0.001$ |
| 1M                                   | 2.48 ± 0.24    | 5.22 ± 0.61    | $t_{14} = -7.49; P < 0.001$ |
| 2M                                   | 3.32 ± 0.15    | 6.19 ± 0.31    | $t_{14} = -7.7; P < 0.001$  |
| 3M                                   | 3.74 ± 0.36    | 6.39 ± 0.50    | $t_{14} = -4.16; P < 0.001$ |
| Ends (Nb)                            |                |                |                             |
| 1D                                   | 2.15 ± 0.15    | 3.28 ± 0.16    | $t_{15} = 5.22; P < 0.001$  |
| 1M                                   | 3.58 ± 0.26    | 6.25 ± 0.59    | $t_{14} = -4.30; P < 0.001$ |
| 2M                                   | 3.51 ± 0.25    | 7.22 ± 0.33    | $t_{14} = -7.74; P < 0.001$ |
| 3M                                   | 4.33 ± 0.16    | 7.56 ± 0.49    | $t_{14} = -7.21; P < 0.001$ |
| Length (µm)                          |                |                |                             |
| 1D                                   | 140.22 ± 13.67 | 214.48 ± 17.67 | $t_{15} = -3.36; P < 0.01$  |
| 1M                                   | 337.32 ± 30.28 | 538.72 ± 49.39 | $t_{14} = -3.47; P < 0.01$  |
| 2M                                   | 396.10 ± 13.56 | 657.72 ± 23.51 | $t_{14} = -8.90; P < 0.001$ |
| 3M                                   | 443.04 ± 21.7  | 738.61 ± 63.42 | $t_{13} = -4.16; P < 0.001$ |
